# Supplementary material for: Sedative Drug Use among King Saud University Medical Students: A Cross-Sectional Sampling Study
Source: Hindawi journal article supplement (doi:10.1155/2014/378738), 2014-01-01
Supplement: f1 [file 378738.f1.pdf]

# The prevalence of sedative use among KSU's medical students

**DISCLOSURE:** This questionnaire has been developed independently by the research group and has no corporate interests. The information obtained will be treated with the highest confidentiality measures.

**KINDLY ANSWER THE FOLLOWING:**

1- Age: .....

2- Sex: Male Female

3- Class (the first three numbers in your university I.D e.g. 428): .....

4- Academic year: 1<sup>st</sup> 2<sup>nd</sup> 3<sup>rd</sup> 4<sup>th</sup> 5<sup>th</sup>

5- G.P.A: 5-4.5 4.5-4 3.5-4 3-3.5 2.5-3 2.5 or less

6- Marital status: Single Married Divorced Widowed Other, specify: .....

7- Fathers' level of education: High school Bachelors Masters PhD Other, specify .....

8- Mothers' level of education: High school Bachelors Masters PhD

Other, please specify:.....

9- Family size (number of family members including yourself) .....

10- Average family income per month in S.R:

1000-5000 5000-10,000 10,000-15,000 15,000-20,000 more than 20,000

11- Residence: With family With friends In the dorm Alone Other, specify .....

12- Are you a smoker (cigarettes, cigars, pipe, Shisha etc...): Yes No Occasionally Ex-smoker

13-Do you exercise regularly? (Regular exercise means 20 minutes 3 times a week): Yes No

14- Do you use any type of stimulants including (Coffee ,Tea ,Cola drinks ,Energy Drinks ,etc...)

A-During non-exam periods:

Never Rarely Occasionally Always

B- During exam periods:

Never Rarely Occasionally Always

15- On average how much time do you spend studying per week? .....

16- On average how many hours do you sleep per day?

4-6    6-8    8-10    more than 10

17- On average how much time do you need to fall asleep? .....

18- Can you specify your sleeping pattern:     Night only    Night and day

19- How can you describe your sleep quality?

- Excellent: uninterrupted, 6-8 hours, deep.
- Good: wake up once or twice, 5-6 hours, complete rest.
- Poor: interrupted, less than 5 hours, superficial incomplete rest.

20- Do you experience any of these sleeping disorders?

- Insomnia: difficulty initiating or maintaining sleep.
- Sleep apnea: obstruction of the airway during sleep.
- Restless legs syndrome: An irresistible urge to move legs.
- Narcolepsy: falling asleep spontaneously at inappropriate times.
- None.
- Other, specify .....

21- Since entering the college of medicine have you ever used sedative drugs e.g. (Panadol Night®, Tylenol pm®, or any other drugs that help you fall asleep):    Yes    No

**If NO, you have finished your questionnaire. If YES please proceed to the following questions:**

22- When have you used these drugs?

- Regularly     Occasionally    Exam periods    At the beginning of the school year\term
- Other (specify) .....

23- For how long have you been using these drugs?

- Isolated occasions    Less than 1 year    1 – 2 years    2 – 3 years    more than 3 years

24- Can you please specify the name of the drug: .....

25- Was the drug prescribed to you by a doctor:    Yes    No

If Yes, Please specify cause.....

**THANK YOU FOR COMPLETING THIS SURVEY.**

Group (A5) 2010 – 2011, 3<sup>rd</sup> year medical school, King Saud University.
